# Supplementary material
Source: bioRxiv or medRxiv preprint supplement (https://www.biorxiv.org/highwire/filestream/87334/field_highwire_adjunct_files/0/269001-1.pdf)

## Appendix

### Table of Contents:

1. Appendix Table 1
2. Appendix Table 2
3. Appendix Table 3
4. Appendix Figure 1

**Appendix Table 1: Crystallographic statistics**

|                                       |                                         |                                         |
|---------------------------------------|-----------------------------------------|-----------------------------------------|
| Dataset:                              | LasR LBD<br>L130F:3OC <sub>14</sub> HSL | LasR LBD<br>L130F:3OC <sub>10</sub> HSL |
| Resolution (Å)                        | 30.0-1.90 (1.98-1.90)                   | 30.0-2.13 (2.20-2.13)                   |
| Unique Reflections                    | 25887                                   | 14503                                   |
| Completeness                          | 96.6 (86.0)                             | 96.4 (84.7)                             |
| <Redundancy>                          | 2.5 (1.7)                               | 2.0 (1.6)                               |
| R <sub>merge</sub>                    | 0.102 (0.379)                           | 0.076 (0.664)                           |
| < I > / < sigma >                     | 14.4 (1.1)                              | 17.4 (1.4)                              |
| Total atoms                           | 2742                                    | 2669                                    |
| R <sub>work</sub> (%)                 | 22.1 (30.1)                             | 19.4 (22.9)                             |
| R <sub>free</sub> (%)                 | 26.0 (33.0)                             | 25.5 (30.4)                             |
| Average B-factor                      | 29.0                                    | 43.0                                    |
| <b>R.m.s. deviation from ideality</b> |                                         |                                         |
| Bond lengths (Å)                      | 0.009                                   | 0.009                                   |
| Bond angles (°)                       | 1.26                                    | 1.02                                    |
| Dihedral angles (°)                   | 17.3                                    | 11.1                                    |
| Phi-Psi values (Ramachandran)         |                                         |                                         |
| Most favored                          |                                         |                                         |
| Additionally allowed                  |                                         |                                         |
| Outliers                              |                                         |                                         |

**Appendix Table 2: Primers used in this study**

| Name   | Sequence                              | Description                          |
|--------|---------------------------------------|--------------------------------------|
| ARM203 | cggtttcttgagctggaacgc                 | LasR forward primer                  |
| ARM204 | aacggccataatggccgctac                 | LasR reverse primer                  |
| ARM357 | acgctgagggtcagcgcgccgag               | lasRS129T forward                    |
| ARM358 | ctcggcgcgctgaccctcagcgt               | lasRS129T reverse                    |
| ARM371 | cacgctgaggcacagcgcgccga               | lasRS129C forward                    |
| ARM372 | tcggcgcgctgtgcctcagcgtg               | lasRS129C reverse                    |
| ARM375 | ctccacgctgaggaacagcgcgccgagtt         | lasRS129F forward                    |
| ARM376 | aactcggcgcgctgttctcagcgtggaag         | lasRS129F reverse                    |
| ARM425 | ctccacgctgagccacagcgcgccgagt          | lasRS129W forward                    |
| ARM426 | actcggcgcgctgtggctcagcgtggaag         | lasRS129W reverse                    |
| ARM437 | ctccacgctgaagctcagcgcgcc              | lasRL130F forward                    |
| ARM438 | ggcgcgctgagcttcagcgtggaag             | lasRL130F reverse                    |
| ARM441 | ctcggcgcgctgatgctcagcgtggaag          | lasRS129M forward                    |
| ARM442 | ctccacgctgagcatcagcgcgccgag           | lasRS129M reverse                    |
| ARM455 | taattaagcttccgaactggaaaagtggtatgtcgcc | lasR pEXG2 upstream forward HindIII  |
| ARM456 | tattagtcgacgctcgccgacctgagaggcaaga    | lasR pEXG2 downstream reverse Sall   |
| ARM470 | taattgatccccgaactggaaaagtggtatgtcgcc  | pUCP18 lasR upstream forward BamHI   |
| ARM471 | tattagaattcgtcgccgacctgagaggcaaga     | pUCP18 lasR downstream reverse EcoRI |
| ARM472 | ctcgactaaccagatgccc                   | pUCP18 lasR overlapping forward      |
| ARM473 | ttggagcgaacgacctacac                  | pUCP18 lasR overlapping reverse      |
| ARM516 | tccttaggcaacagggcgaagaggatcttcg       | lasRG38A forward                     |

|        |                                              |                  |
|--------|----------------------------------------------|------------------|
| ARM517 | cgaagatcctcttcgccctgttgccctaagga             | lasRG38A reverse |
| ARM518 | gctgtccttaggcaacaggatgaagaggatcttcgagaat     | lasRG38I forward |
| ARM519 | attctcgaagatcctcttcacctgttgccctaaggacagc     | lasRG38I reverse |
| ARM520 | tggctgtccttaggcaacagtaggaagaggatcttcgagaatc  | lasRG38L forward |
| ARM521 | gattctcgaagatcctcttcctactgttgccctaaggacagcca | lasRG38L reverse |

**Appendix Table 3: Strains used in this study**

| Name       | Description                                                         | Source                         |
|------------|---------------------------------------------------------------------|--------------------------------|
| UCBPP-PA14 | Wild type, generous gift from Dr. George O'Toole                    | (Kukavica-Ibruli et al., 2008) |
| SM51       | <i>P. aeruginosa</i> $\Delta lasI$                                  | (Mukherjee et al., 2017)       |
| JP113      | <i>E. coli</i> pBad-A- <i>lasR</i> PA14<br>pCS26- <i>lasB-lux</i>   | (Paczkowski et al., 2017)      |
| AM05       | <i>E. coli</i> pBad-A- <i>lasR</i> -S129F<br>pCS26- <i>lasB-lux</i> | This study                     |
| AM06       | <i>E. coli</i> pBad-A- <i>lasR</i> -S129C<br>pCS26- <i>lasB-lux</i> | This study                     |
| AM31       | <i>E. coli</i> pBad-A- <i>lasR</i> -S129M<br>pCS26- <i>lasB-lux</i> | This study                     |
| AM32       | <i>E. coli</i> pBad-A- <i>lasR</i> -S129T<br>pCS26- <i>lasB-lux</i> | This study                     |
| AM28       | <i>E. coli</i> pBad-A- <i>lasR</i> -S129W<br>pCS26- <i>lasB-lux</i> | This study                     |
| AM29       | <i>E. coli</i> pBad-A- <i>lasR</i> -L130F<br>pCS26- <i>lasB-lux</i> | This study                     |
| AM30       | <i>E. coli</i> pBad-A- <i>lasR</i> -L128F<br>pCS26- <i>lasB-lux</i> | This study                     |
| AM51       | <i>E. coli</i> pBad-A- <i>lasR</i> -Y47R<br>pCS26- <i>lasB-lux</i>  | This study                     |
| AM53       | <i>E. coli</i> pBad-A- <i>lasR</i> -Y47S<br>pCS26- <i>lasB-lux</i>  | This study                     |
| AM59       | <i>E. coli</i> pBad-A- <i>lasR</i> -G38A<br>pCS26- <i>lasB-lux</i>  | This study                     |
| AM60       | <i>E. coli</i> pBad-A- <i>lasR</i> -G38I<br>pCS26- <i>lasB-lux</i>  | This study                     |
| AM61       | <i>E. coli</i> pBad-A- <i>lasR</i> -G38L<br>pCS26- <i>lasB-lux</i>  | This study                     |
| AM41       | <i>P. aeruginosa</i> $\Delta lasI$ <i>lasR</i> -<br>S129F           | This study                     |
| AM43       | <i>P. aeruginosa</i> $\Delta lasI$ <i>lasR</i> -<br>L130F           | This study                     |

|                |                                                                                                                                                                                                                         |                           |
|----------------|-------------------------------------------------------------------------------------------------------------------------------------------------------------------------------------------------------------------------|---------------------------|
| AM57           | <i>P. aeruginosa</i> $\Delta lasI$ $\Delta rsaL$                                                                                                                                                                        | This study                |
| pJP14          | <i>E. coli</i> DH-IBP-8xHis-<br><i>lasR:LBD</i> (1-170)                                                                                                                                                                 | (Paczkowski et al., 2017) |
| AM58           | <i>E. coli</i> DH-IBP-8xHis-<br><i>lasR:LBD-L130F</i> (1-170)                                                                                                                                                           | This study                |
| SM10 pir       | <i>E. coli thi thr leu tonA lacY</i><br><i>supE recA::RP4-2-Tc::Mu</i>                                                                                                                                                  | (Simon et al., 1983)      |
| pEXG2          | Allelic exchange vector with pBR origin, gentamicin resistance, <i>sacB</i> , generous gift from Dr. Joseph Mougous                                                                                                     | (Borlee et al., 2010)     |
| pUCP18         | <i>E. coli-Pseudomonas</i> Amp <sup>r</sup> shuttle vector                                                                                                                                                              | (Schweizer., 1991)        |
| BL21 (DE3)     | <i>E. coli</i> B F <sup>-</sup> <i>dcm ompT hsdS(r - m -)</i> <i>gal</i> $\lambda$ (DE3)                                                                                                                                | Agilent                   |
| One Shot Top10 | <i>E. coli</i> F- <i>mcrA</i> $\Delta(mrr-hsdRMS-mcrBC)$ $\phi 80/lacZ\Delta M15$ $\Delta lacX74$ <i>recA1</i> <i>araD139</i> $\Delta(ara-leu)7697$ <i>galU</i> <i>galK</i> <i>rpsL</i> (StrR) <i>endA1</i> <i>nupG</i> | Thermo-Fisher             |

## Appendix Figure 1: Synthetic schemes

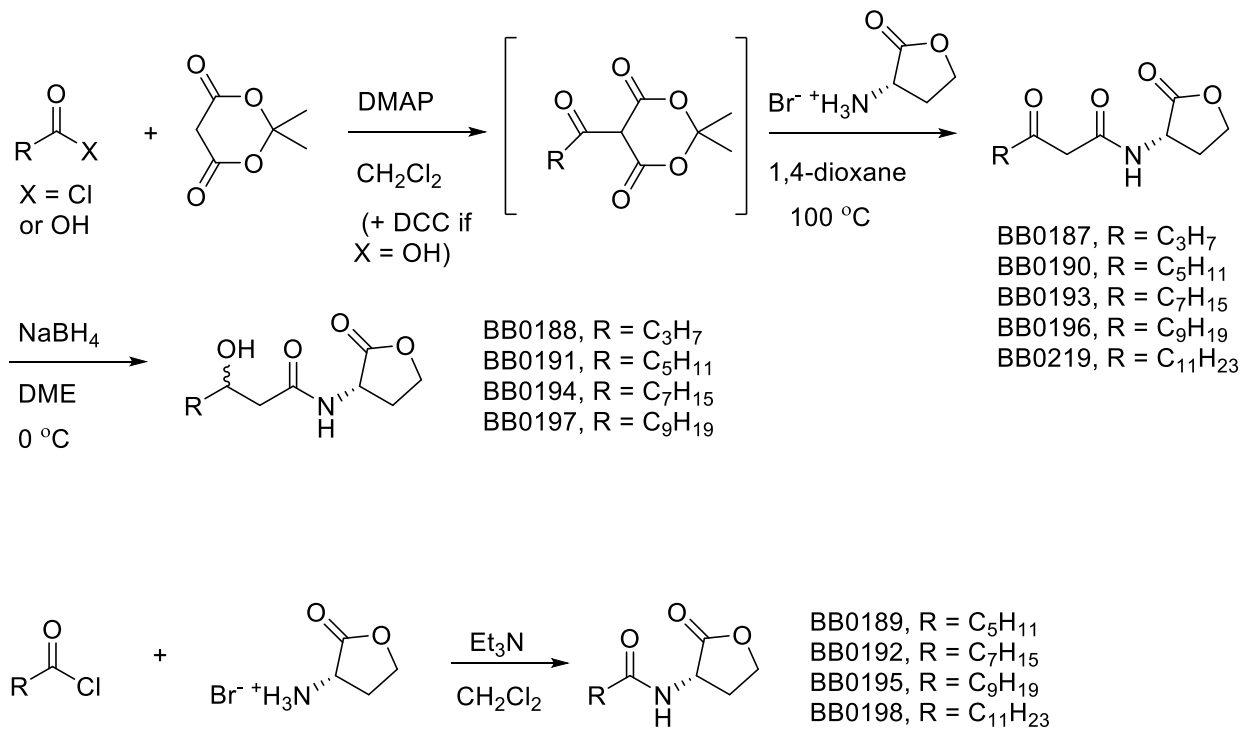

Supplement: Supplementary file [file 269001-1.pdf]
